# Supplementary material
Source: publisher site journal article supplement (https://www.dovepress.com/get_supplementary_file.php?f=417472.xlsx)
Supplement: Supplementary file 1 [file get_supplementary_file.php]

## Sheet: Sheet 1
ONTOLOGY	ID	Description	GeneRatio	BgRatio	pvalue	p.adjust	qvalue	geneID	Count	zscore
BP	GO:0034375	high-density lipoprotein particle remodeling	6/82	16/18800	4.42025e-11	8.94217e-08	6.92351e-08	APOC3/APOC1/LCAT/APOA1/APOA2/APOE	6	-1.63299
BP	GO:0007596	blood coagulation	12/82	221/18800	2.07487e-10	1.42906e-07	1.10646e-07	KLKB1/APOH/C4BPB/HRG/HSPB1/PROZ/CD59/APOE/GP1BA/FBLN1/ACTB/COMP	12	0
BP	GO:0050817	coagulation	12/82	226/18800	2.68554e-10	1.42906e-07	1.10646e-07	KLKB1/APOH/C4BPB/HRG/HSPB1/PROZ/CD59/APOE/GP1BA/FBLN1/ACTB/COMP	12	0
BP	GO:0007599	hemostasis	12/82	227/18800	2.82563e-10	1.42906e-07	1.10646e-07	KLKB1/APOH/C4BPB/HRG/HSPB1/PROZ/CD59/APOE/GP1BA/FBLN1/ACTB/COMP	12	0
BP	GO:0051346	negative regulation of hydrolase activity	14/82	371/18800	6.94337e-10	2.80929e-07	2.1751e-07	AMBP/APOC3/APOC1/ITIH1/HRG/APOA1/FETUB/ITIH4/APOA2/ITIH2/GNAI2/TIMP2/GPX1/TIMP1	14	-2.13809
BP	GO:0034370	triglyceride-rich lipoprotein particle remodeling	5/82	12/18800	1.07865e-09	3.10397e-07	2.40326e-07	APOC3/LCAT/APOA1/APOA2/APOE	5	-1.34164
BP	GO:0034372	very-low-density lipoprotein particle remodeling	5/82	12/18800	1.07865e-09	3.10397e-07	2.40326e-07	APOC3/LCAT/APOA1/APOA2/APOE	5	-1.34164
BP	GO:0034377	plasma lipoprotein particle assembly	6/82	26/18800	1.22747e-09	3.10397e-07	2.40326e-07	APOC3/APOC1/LCAT/APOA1/APOA2/APOE	6	-1.63299
BP	GO:0033700	phospholipid efflux	5/82	13/18800	1.74683e-09	3.92649e-07	3.0401e-07	APOC3/APOC1/APOA1/APOA2/APOE	5	-1.34164
BP	GO:0065005	protein-lipid complex assembly	6/82	29/18800	2.50634e-09	5.07033e-07	3.92572e-07	APOC3/APOC1/LCAT/APOA1/APOA2/APOE	6	-1.63299
BP	GO:0034368	protein-lipid complex remodeling	6/82	30/18800	3.12207e-09	5.26329e-07	4.07513e-07	APOC3/APOC1/LCAT/APOA1/APOA2/APOE	6	-1.63299
BP	GO:0034369	plasma lipoprotein particle remodeling	6/82	30/18800	3.12207e-09	5.26329e-07	4.07513e-07	APOC3/APOC1/LCAT/APOA1/APOA2/APOE	6	-1.63299
BP	GO:0042060	wound healing	14/82	429/18800	4.49907e-09	6.83747e-07	5.29394e-07	KLKB1/APOH/C4BPB/HRG/HSPB1/PROZ/CD59/APOE/GP1BA/FBLN1/GPX1/ACTB/COMP/TIMP1	14	0.534522
BP	GO:0034367	protein-containing complex remodeling	6/82	32/18800	4.73181e-09	6.83747e-07	5.29394e-07	APOC3/APOC1/LCAT/APOA1/APOA2/APOE	6	-1.63299
BP	GO:0050878	regulation of body fluid levels	13/82	382/18800	1.03213e-08	1.28485e-06	9.94802e-07	KLKB1/APOH/C4BPB/HRG/HSPB1/PROZ/GNAI2/CD59/APOE/GP1BA/FBLN1/ACTB/COMP	13	-0.27735
BP	GO:0034433	steroid esterification	5/82	18/18800	1.14322e-08	1.28485e-06	9.94802e-07	APOC1/LCAT/APOA1/APOA2/APOE	5	-1.34164
BP	GO:0034434	sterol esterification	5/82	18/18800	1.14322e-08	1.28485e-06	9.94802e-07	APOC1/LCAT/APOA1/APOA2/APOE	5	-1.34164
BP	GO:0034435	cholesterol esterification	5/82	18/18800	1.14322e-08	1.28485e-06	9.94802e-07	APOC1/LCAT/APOA1/APOA2/APOE	5	-1.34164
BP	GO:0006641	triglyceride metabolic process	8/82	103/18800	1.5715e-08	1.67323e-06	1.29551e-06	APOC3/APOC1/APOH/PCSK9/APOA1/APOA2/APOE/GPX1	8	-1.41421
BP	GO:0043691	reverse cholesterol transport	5/82	20/18800	2.05459e-08	2.07822e-06	1.60907e-06	APOC3/LCAT/APOA1/APOA2/APOE	5	-1.34164
BP	GO:0071827	plasma lipoprotein particle organization	6/82	45/18800	4.06551e-08	3.91644e-06	3.03232e-06	APOC3/APOC1/LCAT/APOA1/APOA2/APOE	6	-1.63299
BP	GO:0030301	cholesterol transport	7/82	79/18800	5.20787e-08	4.78887e-06	3.7078e-06	APOC3/APOC1/PCSK9/LCAT/APOA1/APOA2/APOE	7	-1.88982
BP	GO:0071825	protein-lipid complex subunit organization	6/82	48/18800	6.06178e-08	5.33173e-06	4.12811e-06	APOC3/APOC1/LCAT/APOA1/APOA2/APOE	6	-1.63299
BP	GO:0010876	lipid localization	13/82	446/18800	6.38467e-08	5.38174e-06	4.16684e-06	APOF/APOC3/APOC1/APOH/APOC4/PCSK9/LCAT/APOA1/APOA2/HEXB/APOE/LBP/CRP	13	-1.38675
BP	GO:1900047	negative regulation of hemostasis	6/82	49/18800	6.88369e-08	5.57028e-06	4.31281e-06	KLKB1/APOH/HRG/APOE/GP1BA/COMP	6	0
BP	GO:0097006	regulation of plasma lipoprotein particle levels	7/82	84/18800	7.99642e-08	6.22183e-06	4.81728e-06	APOC3/APOC1/PCSK9/LCAT/APOA1/APOA2/APOE	7	-1.88982
BP	GO:0006639	acylglycerol metabolic process	8/82	131/18800	1.03639e-07	7.76521e-06	6.01225e-06	APOC3/APOC1/APOH/PCSK9/APOA1/APOA2/APOE/GPX1	8	-1.41421
BP	GO:0006638	neutral lipid metabolic process	8/82	132/18800	1.09939e-07	7.77487e-06	6.01973e-06	APOC3/APOC1/APOH/PCSK9/APOA1/APOA2/APOE/GPX1	8	-1.41421
BP	GO:0034381	plasma lipoprotein particle clearance	6/82	53/18800	1.11454e-07	7.77487e-06	6.01973e-06	APOC3/APOC1/PCSK9/APOA1/APOA2/APOE	6	-1.63299
BP	GO:0042157	lipoprotein metabolic process	8/82	140/18800	1.73326e-07	1.13877e-05	8.817e-06	APOC3/APOC1/ATG10/PCSK9/LCAT/APOA1/APOA2/APOE	8	-2.12132
BP	GO:0015918	sterol transport	7/82	94/18800	1.74503e-07	1.13877e-05	8.817e-06	APOC3/APOC1/PCSK9/LCAT/APOA1/APOA2/APOE	7	-1.88982
BP	GO:0010872	regulation of cholesterol esterification	4/82	14/18800	3.25478e-07	2.05763e-05	1.59313e-05	APOC1/APOA1/APOA2/APOE	4	-1
BP	GO:0032488	Cdc42 protein signal transduction	4/82	15/18800	4.42361e-07	2.55685e-05	1.97965e-05	APOC3/APOA1/APOE/CDC42	4	0
BP	GO:0034380	high-density lipoprotein particle assembly	4/82	15/18800	4.42361e-07	2.55685e-05	1.97965e-05	LCAT/APOA1/APOA2/APOE	4	-1
BP	GO:0034384	high-density lipoprotein particle clearance	4/82	15/18800	4.42361e-07	2.55685e-05	1.97965e-05	APOC3/APOA1/APOA2/APOE	4	-1
BP	GO:1900046	regulation of hemostasis	6/82	68/18800	5.04446e-07	2.83471e-05	2.19478e-05	KLKB1/APOH/HRG/APOE/GP1BA/COMP	6	0
BP	GO:0033344	cholesterol efflux	6/82	69/18800	5.50577e-07	3.01032e-05	2.33075e-05	APOC3/APOC1/APOA1/RXRA/APOA2/APOE	6	-1.63299
BP	GO:0052547	regulation of peptidase activity	12/82	456/18800	6.3939e-07	3.40391e-05	2.63549e-05	AMBP/ITIH1/HRG/FETUB/ITIH4/ITIH2/TIMP2/GRN/FBLN1/GPX1/PDCD6/TIMP1	12	0
BP	GO:0072376	protein activation cascade	4/82	17/18800	7.6619e-07	3.97436e-05	3.07717e-05	KLKB1/APOH/GP1BA/FBLN1	4	0
BP	GO:0006869	lipid transport	11/82	391/18800	1.02068e-06	5.1621e-05	3.99678e-05	APOF/APOC3/APOC1/APOH/APOC4/PCSK9/LCAT/APOA1/APOA2/APOE/LBP	11	-2.11058
BP	GO:0010951	negative regulation of endopeptidase activity	9/82	251/18800	1.46494e-06	7.22823e-05	5.59648e-05	AMBP/ITIH1/HRG/FETUB/ITIH4/ITIH2/TIMP2/GPX1/TIMP1	9	-1
BP	GO:0051004	regulation of lipoprotein lipase activity	4/82	20/18800	1.54428e-06	7.43829e-05	5.75912e-05	APOC3/APOC1/APOH/APOA1	4	-2
BP	GO:0030195	negative regulation of blood coagulation	5/82	48/18800	2.06224e-06	9.59208e-05	7.4267e-05	KLKB1/APOH/HRG/APOE/GP1BA	5	-0.447214
BP	GO:0010466	negative regulation of peptidase activity	9/82	262/18800	2.08626e-06	9.59208e-05	7.4267e-05	AMBP/ITIH1/HRG/FETUB/ITIH4/ITIH2/TIMP2/GPX1/TIMP1	9	-1
BP	GO:0008203	cholesterol metabolic process	7/82	139/18800	2.48547e-06	0.000111736	8.65117e-05	APOF/PCSK9/LCAT/APOA1/RXRA/APOA2/APOE	7	-1.88982
BP	GO:0050819	negative regulation of coagulation	5/82	52/18800	3.08768e-06	0.000135791	0.000105137	KLKB1/APOH/HRG/APOE/GP1BA	5	-0.447214
BP	GO:0042730	fibrinolysis	4/82	24/18800	3.34222e-06	0.000143858	0.000111382	KLKB1/APOH/HRG/GP1BA	4	-1
BP	GO:1902652	secondary alcohol metabolic process	7/82	149/18800	3.9444e-06	0.00016624	0.000128712	APOF/PCSK9/LCAT/APOA1/RXRA/APOA2/APOE	7	-1.88982
BP	GO:0042632	cholesterol homeostasis	6/82	98/18800	4.37236e-06	0.000180516	0.000139765	APOC3/PCSK9/LCAT/APOA1/APOA2/APOE	6	-1.63299
BP	GO:0055092	sterol homeostasis	6/82	99/18800	4.63836e-06	0.000187668	0.000145303	APOC3/PCSK9/LCAT/APOA1/APOA2/APOE	6	-1.63299
BP	GO:0016125	sterol metabolic process	7/82	154/18800	4.90664e-06	0.00019463	0.000150693	APOF/PCSK9/LCAT/APOA1/RXRA/APOA2/APOE	7	-1.88982
BP	GO:1905952	regulation of lipid localization	7/82	155/18800	5.1208e-06	0.00019886	0.000153968	APOC1/APOC4/PCSK9/APOA1/APOA2/APOE/CRP	7	-1.13389
BP	GO:0051702	biological process involved in interaction with symbiont	6/82	101/18800	5.20987e-06	0.00019886	0.000153968	ZBED1/HRG/APOE/GPX1/DCD/CRP	6	0.816497
BP	GO:0002698	negative regulation of immune effector process	6/82	112/18800	9.46738e-06	0.000354676	0.000274609	C4BPB/APOA1/APOA2/CD59/FGL2/GRN	6	0
BP	GO:0002526	acute inflammatory response	6/82	113/18800	9.96371e-06	0.000365676	0.000283126	KLKB1/ITIH4/APOA2/SAA4/LBP/CRP	6	-0.816497
BP	GO:0030193	regulation of blood coagulation	5/82	66/18800	1.01225e-05	0.000365676	0.000283126	KLKB1/APOH/HRG/APOE/GP1BA	5	-0.447214
BP	GO:0055088	lipid homeostasis	7/82	173/18800	1.05277e-05	0.000373641	0.000289293	APOC3/APOC4/PCSK9/LCAT/APOA1/APOA2/APOE	7	-1.88982
BP	GO:0045940	positive regulation of steroid metabolic process	4/82	33/18800	1.2492e-05	0.000431543	0.000334124	APOC1/APOA1/APOA2/APOE	4	-1
BP	GO:0015850	organic hydroxy compound transport	8/82	248/18800	1.25858e-05	0.000431543	0.000334124	APOC3/APOC1/PCSK9/LCAT/APOA1/APOA2/APOE/ACTB	8	-1.41421
BP	GO:0098883	synapse pruning	3/82	11/18800	1.28679e-05	0.000433861	0.000335919	C1QB/C1QC/C1QA	3	1.73205
BP	GO:0050818	regulation of coagulation	5/82	71/18800	1.4498e-05	0.000480811	0.000372269	KLKB1/APOH/HRG/APOE/GP1BA	5	-0.447214
BP	GO:0052548	regulation of endopeptidase activity	10/82	426/18800	1.60298e-05	0.000523037	0.000404963	AMBP/ITIH1/HRG/FETUB/ITIH4/ITIH2/TIMP2/GPX1/PDCD6/TIMP1	10	-0.632456
BP	GO:0061045	negative regulation of wound healing	5/82	76/18800	2.02247e-05	0.000638941	0.000494703	KLKB1/APOH/HRG/APOE/GP1BA	5	-0.447214
BP	GO:0045861	negative regulation of proteolysis	9/82	350/18800	2.14953e-05	0.000638941	0.000494703	AMBP/ITIH1/HRG/FETUB/ITIH4/ITIH2/TIMP2/GPX1/TIMP1	9	-1
BP	GO:0001935	endothelial cell proliferation	7/82	194/18800	2.21123e-05	0.000638941	0.000494703	ERN1/APOH/APOA1/IGF2/APOE/MMP14/PDCD6	7	-0.377964
BP	GO:0032371	regulation of sterol transport	4/82	38/18800	2.21637e-05	0.000638941	0.000494703	APOC1/PCSK9/APOA1/APOA2	4	-2
BP	GO:0032374	regulation of cholesterol transport	4/82	38/18800	2.21637e-05	0.000638941	0.000494703	APOC1/PCSK9/APOA1/APOA2	4	-2
BP	GO:0032372	negative regulation of sterol transport	3/82	13/18800	2.21641e-05	0.000638941	0.000494703	APOC1/PCSK9/APOA2	3	-1.73205
BP	GO:0032375	negative regulation of cholesterol transport	3/82	13/18800	2.21641e-05	0.000638941	0.000494703	APOC1/PCSK9/APOA2	3	-1.73205
BP	GO:0030168	platelet activation	6/82	130/18800	2.21737e-05	0.000638941	0.000494703	HRG/HSPB1/APOE/GP1BA/ACTB/COMP	6	0.816497
BP	GO:0050673	epithelial cell proliferation	10/82	443/18800	2.24245e-05	0.000638941	0.000494703	ERN1/APOH/APOA1/IGF2/APOE/MMP14/CDC42/GRN/GPX1/PDCD6	10	0.632456
BP	GO:0006956	complement activation	6/82	131/18800	2.31578e-05	0.000650669	0.000503783	C4BPB/C1QB/CD59/C1QC/C1QA/CRP	6	1.63299
BP	GO:0018158	protein oxidation	3/82	14/18800	2.81201e-05	0.000768742	0.000595202	APOA1/APOA2/GPX1	3	-0.57735
BP	GO:0051917	regulation of fibrinolysis	3/82	14/18800	2.81201e-05	0.000768742	0.000595202	KLKB1/APOH/HRG	3	-1.73205
BP	GO:0043542	endothelial cell migration	8/82	279/18800	2.93394e-05	0.000791381	0.00061273	APOH/HRG/HSPB1/APOA1/APOE/GRN/GPX1/PDCD6	8	0
BP	GO:0055090	acylglycerol homeostasis	4/82	42/18800	3.31656e-05	0.000871351	0.000674647	APOC3/APOC4/APOA1/APOE	4	-1
BP	GO:0070328	triglyceride homeostasis	4/82	42/18800	3.31656e-05	0.000871351	0.000674647	APOC3/APOC4/APOA1/APOE	4	-1
BP	GO:0072378	blood coagulation, fibrin clot formation	3/82	15/18800	3.50395e-05	0.000908781	0.000703628	APOH/GP1BA/FBLN1	3	0.57735
BP	GO:0019915	lipid storage	5/82	86/18800	3.68485e-05	0.0009436	0.000730586	APOC4/APOA1/HEXB/APOE/CRP	5	0.447214
BP	GO:0008228	opsonization	3/82	16/18800	4.29899e-05	0.00108711	0.000841697	C4BPB/LBP/CRP	3	0.57735
BP	GO:0001667	ameboidal-type cell migration	10/82	480/18800	4.42679e-05	0.00110561	0.000856019	APOH/HRG/HSPB1/APOA1/APOE/CDC42/GRN/GPX1/PDCD6/TIMP1	10	0.632456
BP	GO:0060191	regulation of lipase activity	5/82	90/18800	4.58723e-05	0.0011317	0.000876225	APOC3/APOC1/APOH/APOA1/APOA2	5	-2.23607
BP	GO:1903035	negative regulation of response to wounding	5/82	92/18800	5.09807e-05	0.0012385	0.000958914	KLKB1/APOH/HRG/APOE/GP1BA	5	-0.447214
BP	GO:1905953	negative regulation of lipid localization	4/82	47/18800	5.19826e-05	0.0012385	0.000958914	APOC1/PCSK9/APOA2/CRP	4	-1
BP	GO:0060192	negative regulation of lipase activity	3/82	17/18800	5.20378e-05	0.0012385	0.000958914	APOC3/APOC1/APOA2	3	-1.73205
BP	GO:0046486	glycerolipid metabolic process	9/82	396/18800	5.62441e-05	0.00131427	0.00101758	APOC3/APOC1/APOH/PCSK9/LCAT/APOA1/APOA2/APOE/GPX1	9	-1.66667
BP	GO:0006953	acute-phase response	4/82	48/18800	5.65208e-05	0.00131427	0.00101758	ITIH4/SAA4/LBP/CRP	4	0
BP	GO:0006909	phagocytosis	8/82	310/18800	6.17661e-05	0.00141992	0.00109938	C4BPB/APOA1/APOA2/CD14/CDC42/LBP/LMAN2/CRP	8	0.707107
BP	GO:0006959	humoral immune response	8/82	317/18800	7.2203e-05	0.0016412	0.0012707	C4BPB/HRG/C1QB/DEFB1/CD59/C1QC/C1QA/CRP	8	1.41421
BP	GO:0010985	negative regulation of lipoprotein particle clearance	3/82	19/18800	7.36883e-05	0.00165635	0.00128244	APOC3/APOC1/PCSK9	3	-1.73205
BP	GO:0008202	steroid metabolic process	8/82	323/18800	8.22796e-05	0.00182914	0.00141622	APOF/APOC1/PCSK9/LCAT/APOA1/RXRA/APOA2/APOE	8	-2.12132
BP	GO:0015914	phospholipid transport	5/82	102/18800	8.3458e-05	0.00183517	0.00142089	APOC3/APOC1/APOA1/APOA2/APOE	5	-1.34164
BP	GO:1903034	regulation of response to wounding	6/82	166/18800	8.70809e-05	0.00189424	0.00146663	KLKB1/APOH/HRG/APOE/GP1BA/GRN	6	0
BP	GO:0002683	negative regulation of immune system process	9/82	425/18800	9.65617e-05	0.00207813	0.001609	AMBP/C4BPB/APOA1/APOA2/CD59/FGL2/GRN/GPX1/C1QC	9	0.333333
BP	GO:0150146	cell junction disassembly	3/82	21/18800	0.000100506	0.00214025	0.0016571	C1QB/C1QC/C1QA	3	1.73205
BP	GO:0032102	negative regulation of response to external stimulus	9/82	429/18800	0.000103673	0.00218469	0.0016915	KLKB1/APOH/HRG/APOA1/APOE/GP1BA/FGL2/GRN/GPX1	9	0.333333
BP	GO:0006958	complement activation, classical pathway	5/82	108/18800	0.000109436	0.00228236	0.00176713	C4BPB/C1QB/C1QC/C1QA/CRP	5	1.34164
BP	GO:0032928	regulation of superoxide anion generation	3/82	22/18800	0.00011601	0.00239477	0.00185416	GNAI2/PON3/CRP	3	0.57735
BP	GO:0050777	negative regulation of immune response	6/82	179/18800	0.000131766	0.00269255	0.00208472	AMBP/C4BPB/CD59/FGL2/GRN/GPX1	6	0.816497
BP	GO:0050994	regulation of lipid catabolic process	4/82	61/18800	0.000145204	0.00293747	0.00227435	APOC3/APOC1/APOA1/APOA2	4	-2
BP	GO:0051043	regulation of membrane protein ectodomain proteolysis	3/82	24/18800	0.000151513	0.003012	0.00233205	TIMP2/APOE/TIMP1	3	1.73205
BP	GO:0070997	neuron death	8/82	353/18800	0.000151865	0.003012	0.00233205	THRB/PCSK9/APOE/CDC42/UBB/GRN/GPX1/C1QA	8	1.41421
BP	GO:0032368	regulation of lipid transport	5/82	118/18800	0.000166032	0.00325213	0.00251797	APOC1/PCSK9/APOA1/APOA2/APOE	5	-1.34164
BP	GO:0010631	epithelial cell migration	8/82	358/18800	0.000167188	0.00325213	0.00251797	APOH/HRG/HSPB1/APOA1/APOE/GRN/GPX1/PDCD6	8	0
BP	GO:0090132	epithelium migration	8/82	361/18800	0.000176978	0.00340978	0.00264004	APOH/HRG/HSPB1/APOA1/APOE/GRN/GPX1/PDCD6	8	0
BP	GO:0002455	humoral immune response mediated by circulating immunoglobulin	5/82	121/18800	0.000186732	0.00356376	0.00275925	C4BPB/C1QB/C1QC/C1QA/CRP	5	1.34164
BP	GO:0050995	negative regulation of lipid catabolic process	3/82	26/18800	0.000193411	0.00364034	0.00281854	APOC3/APOC1/APOA2	3	-1.73205
BP	GO:0090130	tissue migration	8/82	366/18800	0.000194343	0.00364034	0.00281854	APOH/HRG/HSPB1/APOA1/APOE/GRN/GPX1/PDCD6	8	0
BP	GO:0010875	positive regulation of cholesterol efflux	3/82	27/18800	0.000216904	0.00402567	0.00311689	APOA1/RXRA/APOE	3	-0.57735
BP	GO:0046503	glycerolipid catabolic process	4/82	68/18800	0.000221415	0.00407203	0.00315279	APOC3/APOC1/APOA1/APOA2	4	-2
BP	GO:0070527	platelet aggregation	4/82	69/18800	0.000234266	0.00426954	0.00330571	HSPB1/GP1BA/ACTB/COMP	4	1
BP	GO:0044403	biological process involved in symbiotic interaction	7/82	286/18800	0.000251581	0.00454418	0.00351835	ZBED1/HRG/APOE/MRC1/GPX1/DCD/CRP	7	1.13389
BP	GO:0006656	phosphatidylcholine biosynthetic process	3/82	29/18800	0.000269265	0.00473673	0.00366743	LCAT/APOA1/APOA2	3	-1.73205
BP	GO:0030212	hyaluronan metabolic process	3/82	29/18800	0.000269265	0.00473673	0.00366743	ITIH1/ITIH4/ITIH2	3	-1.73205
BP	GO:0032369	negative regulation of lipid transport	3/82	29/18800	0.000269265	0.00473673	0.00366743	APOC1/PCSK9/APOA2	3	-1.73205
BP	GO:0061041	regulation of wound healing	5/82	133/18800	0.000289847	0.00505483	0.00391372	KLKB1/APOH/HRG/APOE/GP1BA	5	-0.447214
BP	GO:0030100	regulation of endocytosis	6/82	208/18800	0.000297008	0.00513545	0.00397614	APOC3/APOC1/PCSK9/APOE/CD14/CDC42	6	0
BP	GO:0046470	phosphatidylcholine metabolic process	4/82	74/18800	0.000306693	0.00525797	0.004071	APOC1/LCAT/APOA1/APOA2	4	-2
BP	GO:0044788	modulation by host of viral process	3/82	32/18800	0.000362075	0.00615528	0.00476575	ZBED1/APOE/CRP	3	0.57735
BP	GO:0015748	organophosphate ester transport	5/82	145/18800	0.000431349	0.00719808	0.00557314	APOC3/APOC1/APOA1/APOA2/APOE	5	-1.34164
BP	GO:0010984	regulation of lipoprotein particle clearance	3/82	34/18800	0.000434091	0.00719808	0.00557314	APOC3/APOC1/PCSK9	3	-1.73205
BP	GO:0090322	regulation of superoxide metabolic process	3/82	34/18800	0.000434091	0.00719808	0.00557314	GNAI2/PON3/CRP	3	0.57735
BP	GO:0010594	regulation of endothelial cell migration	6/82	230/18800	0.000506826	0.00833584	0.00645406	APOH/HRG/HSPB1/APOE/GRN/PDCD6	6	0
BP	GO:0048261	negative regulation of receptor-mediated endocytosis	3/82	36/18800	0.000514707	0.00839719	0.00650156	APOC3/APOC1/PCSK9	3	-1.73205
BP	GO:0045834	positive regulation of lipid metabolic process	5/82	153/18800	0.000551141	0.00891967	0.00690609	APOC1/APOA1/APOA2/APOE/CDC42	5	-0.447214
BP	GO:0045730	respiratory burst	3/82	37/18800	0.000558367	0.00896489	0.0069411	GRN/LBP/PGAM1	3	1.73205
BP	GO:1901216	positive regulation of neuron death	4/82	87/18800	0.000568384	0.00905387	0.00700999	PCSK9/CDC42/GRN/C1QA	4	1
BP	GO:0051235	maintenance of location	7/82	331/18800	0.000604315	0.00955101	0.00739491	APOC4/APOA1/HEXB/APOE/GP1BA/GSTO1/CRP	7	1.13389
BP	GO:0051402	neuron apoptotic process	6/82	241/18800	0.000647808	0.010159	0.00786567	THRB/PCSK9/APOE/CDC42/GRN/GPX1	6	0.816497
BP	GO:0006898	receptor-mediated endocytosis	6/82	246/18800	0.000721162	0.0112224	0.00868898	APOC3/APOC1/PCSK9/APOE/CD14/MRC1	6	0
BP	GO:0034109	homotypic cell-cell adhesion	4/82	93/18800	0.000730953	0.0112879	0.00873973	HSPB1/GP1BA/ACTB/COMP	4	1
BP	GO:0009636	response to toxic substance	6/82	247/18800	0.000736575	0.0112886	0.00874022	GPX3/APOE/GPX1/PON3/BLMH/GSTO1	6	2.44949
BP	GO:0046461	neutral lipid catabolic process	3/82	41/18800	0.000756493	0.0114208	0.00884258	APOC3/APOA1/APOA2	3	-1.73205
BP	GO:0046464	acylglycerol catabolic process	3/82	41/18800	0.000756493	0.0114208	0.00884258	APOC3/APOA1/APOA2	3	-1.73205
BP	GO:0090207	regulation of triglyceride metabolic process	3/82	42/18800	0.000812133	0.0118614	0.00918372	APOC3/APOA1/APOE	3	-0.57735
BP	GO:0030300	regulation of intestinal cholesterol absorption	2/82	10/18800	0.00082672	0.0118614	0.00918372	APOA1/APOA2	2	-1.41421
BP	GO:0034379	very-low-density lipoprotein particle assembly	2/82	10/18800	0.00082672	0.0118614	0.00918372	APOC3/APOC1	2	-1.41421
BP	GO:0051006	positive regulation of lipoprotein lipase activity	2/82	10/18800	0.00082672	0.0118614	0.00918372	APOH/APOA1	2	-1.41421
BP	GO:0051918	negative regulation of fibrinolysis	2/82	10/18800	0.00082672	0.0118614	0.00918372	APOH/HRG	2	-1.41421
BP	GO:0070391	response to lipoteichoic acid	2/82	10/18800	0.00082672	0.0118614	0.00918372	CD14/LBP	2	1.41421
BP	GO:0071223	cellular response to lipoteichoic acid	2/82	10/18800	0.00082672	0.0118614	0.00918372	CD14/LBP	2	1.41421
BP	GO:0045807	positive regulation of endocytosis	4/82	97/18800	0.000856062	0.0121959	0.0094427	PCSK9/APOE/CD14/CDC42	4	1
BP	GO:0042554	superoxide anion generation	3/82	43/18800	0.00087031	0.0123121	0.00953272	GNAI2/PON3/CRP	3	0.57735
BP	GO:0002697	regulation of immune effector process	7/82	353/18800	0.00088184	0.0123886	0.00959194	C4BPB/APOA1/APOA2/CD59/FGL2/GRN/LBP	7	0.377964
BP	GO:0006509	membrane protein ectodomain proteolysis	3/82	44/18800	0.000931067	0.0129591	0.0100337	TIMP2/APOE/TIMP1	3	1.73205
BP	GO:0051051	negative regulation of transport	8/82	464/18800	0.00093526	0.0129591	0.0100337	APOC3/APOC1/PCSK9/APOA2/GNAI2/APOE/RAP1B/GSTO1	8	-0.707107
BP	GO:0098869	cellular oxidant detoxification	4/82	100/18800	0.000959295	0.0132017	0.0102215	GPX3/APOE/GPX1/GSTO1	4	2
BP	GO:0042158	lipoprotein biosynthetic process	4/82	101/18800	0.00099557	0.0133527	0.0103384	ATG10/LCAT/APOA1/APOE	4	-1
BP	GO:0006066	alcohol metabolic process	7/82	361/18800	0.00100465	0.0133527	0.0103384	APOF/PCSK9/LCAT/APOA1/RXRA/APOA2/APOE	7	-1.88982
BP	GO:0061365	positive regulation of triglyceride lipase activity	2/82	11/18800	0.00100758	0.0133527	0.0103384	APOH/APOA1	2	-1.41421
BP	GO:1904729	regulation of intestinal lipid absorption	2/82	11/18800	0.00100758	0.0133527	0.0103384	APOA1/APOA2	2	-1.41421
BP	GO:2000644	regulation of receptor catabolic process	2/82	11/18800	0.00100758	0.0133527	0.0103384	PCSK9/APOE	2	0
BP	GO:0043534	blood vessel endothelial cell migration	5/82	175/18800	0.00100987	0.0133527	0.0103384	HRG/HSPB1/APOA1/APOE/GPX1	5	-0.447214
BP	GO:0032677	regulation of interleukin-8 production	4/82	102/18800	0.0010328	0.0135672	0.0105045	APOA2/CD14/LBP/CRP	4	1
BP	GO:0032637	interleukin-8 production	4/82	103/18800	0.001071	0.0139782	0.0108227	APOA2/CD14/LBP/CRP	4	1
BP	GO:0019218	regulation of steroid metabolic process	4/82	104/18800	0.00111017	0.0143967	0.0111467	APOC1/APOA1/APOA2/APOE	4	-1
BP	GO:0045833	negative regulation of lipid metabolic process	4/82	105/18800	0.00115035	0.0148227	0.0114765	APOC3/APOC1/APOA2/APOE	4	-1
BP	GO:0006090	pyruvate metabolic process	4/82	106/18800	0.00119153	0.0151495	0.0117296	PGAM1/LDHB/LDHA/ALDOB	4	2
BP	GO:0010543	regulation of platelet activation	3/82	48/18800	0.00120078	0.0151495	0.0117296	HRG/APOE/GP1BA	3	0.57735
BP	GO:0045916	negative regulation of complement activation	2/82	12/18800	0.00120567	0.0151495	0.0117296	C4BPB/CD59	2	0
BP	GO:0090209	negative regulation of triglyceride metabolic process	2/82	12/18800	0.00120567	0.0151495	0.0117296	APOC3/APOE	2	0
BP	GO:0042304	regulation of fatty acid biosynthetic process	3/82	49/18800	0.00127509	0.0158252	0.0122527	APOC3/APOC1/APOA1	3	-1.73205
BP	GO:0120009	intermembrane lipid transfer	3/82	49/18800	0.00127509	0.0158252	0.0122527	APOA1/APOA2/APOE	3	-0.57735
BP	GO:0050678	regulation of epithelial cell proliferation	7/82	382/18800	0.0013919	0.0171696	0.0132936	APOH/IGF2/APOE/CDC42/GRN/GPX1/PDCD6	7	1.13389
BP	GO:0018206	peptidyl-methionine modification	2/82	13/18800	0.00142085	0.0172119	0.0133264	APOA1/APOA2	2	-1.41421
BP	GO:0072520	seminiferous tubule development	2/82	13/18800	0.00142085	0.0172119	0.0133264	REC8/UBB	2	0
BP	GO:1904478	regulation of intestinal absorption	2/82	13/18800	0.00142085	0.0172119	0.0133264	APOA1/APOA2	2	-1.41421
BP	GO:0050821	protein stabilization	5/82	191/18800	0.00148883	0.017928	0.0138808	APOA1/APOA2/AHSP/CPN2/GRN	5	0.447214
BP	GO:0010874	regulation of cholesterol efflux	3/82	52/18800	0.0015152	0.0180309	0.0139605	APOA1/RXRA/APOE	3	-0.57735
BP	GO:0043525	positive regulation of neuron apoptotic process	3/82	52/18800	0.0015152	0.0180309	0.0139605	PCSK9/CDC42/GRN	3	0.57735
BP	GO:1990748	cellular detoxification	4/82	115/18800	0.00160984	0.019045	0.0147457	GPX3/APOE/GPX1/GSTO1	4	2
BP	GO:0010896	regulation of triglyceride catabolic process	2/82	14/18800	0.00165298	0.0192182	0.0148798	APOC3/APOA1	2	-1.41421
BP	GO:1905049	negative regulation of metallopeptidase activity	2/82	14/18800	0.00165298	0.0192182	0.0148798	TIMP2/TIMP1	2	1.41421
BP	GO:2001140	positive regulation of phospholipid transport	2/82	14/18800	0.00165298	0.0192182	0.0148798	APOA1/APOE	2	0
BP	GO:0010632	regulation of epithelial cell migration	6/82	290/18800	0.00167932	0.0193644	0.014993	APOH/HRG/HSPB1/APOE/GRN/PDCD6	6	0
BP	GO:0042176	regulation of protein catabolic process	7/82	395/18800	0.0016847	0.0193644	0.014993	PCSK9/C4BPB/TIMP2/APOE/UBB/GPX1/TIMP1	7	1.13389
BP	GO:0045806	negative regulation of endocytosis	3/82	56/18800	0.00187687	0.0211402	0.0163679	APOC3/APOC1/PCSK9	3	-1.73205
BP	GO:0030203	glycosaminoglycan metabolic process	4/82	120/18800	0.00188166	0.0211402	0.0163679	ITIH1/ITIH4/ITIH2/HEXB	4	-1
BP	GO:0002679	respiratory burst involved in defense response	2/82	15/18800	0.00190189	0.0211402	0.0163679	GRN/LBP	2	1.41421
BP	GO:0010989	negative regulation of low-density lipoprotein particle clearance	2/82	15/18800	0.00190189	0.0211402	0.0163679	APOC3/PCSK9	2	-1.41421
BP	GO:0044793	negative regulation by host of viral process	2/82	15/18800	0.00190189	0.0211402	0.0163679	ZBED1/CRP	2	0
BP	GO:2001138	regulation of phospholipid transport	2/82	15/18800	0.00190189	0.0211402	0.0163679	APOA1/APOE	2	0
BP	GO:0097237	cellular response to toxic substance	4/82	123/18800	0.00205918	0.0227032	0.0175781	GPX3/APOE/GPX1/GSTO1	4	2
BP	GO:0033619	membrane protein proteolysis	3/82	58/18800	0.00207617	0.0227032	0.0175781	TIMP2/APOE/TIMP1	3	1.73205
BP	GO:1900024	regulation of substrate adhesion-dependent cell spreading	3/82	58/18800	0.00207617	0.0227032	0.0175781	APOA1/CDC42/FBLN1	3	0.57735
BP	GO:0002921	negative regulation of humoral immune response	2/82	16/18800	0.00216745	0.0233231	0.018058	C4BPB/CD59	2	0
BP	GO:0006089	lactate metabolic process	2/82	16/18800	0.00216745	0.0233231	0.018058	LDHB/LDHA	2	1.41421
BP	GO:0034374	low-density lipoprotein particle remodeling	2/82	16/18800	0.00216745	0.0233231	0.018058	APOA2/APOE	2	0
BP	GO:0051055	negative regulation of lipid biosynthetic process	3/82	61/18800	0.00239901	0.0256783	0.0198815	APOC3/APOC1/APOE	3	-0.57735
BP	GO:0033194	response to hydroperoxide	2/82	17/18800	0.0024495	0.0258091	0.0199828	GPX3/GPX1	2	1.41421
BP	GO:0086103	G protein-coupled receptor signaling pathway involved in heart process	2/82	17/18800	0.0024495	0.0258091	0.0199828	GNAI2/CDC42	2	0
BP	GO:0090594	inflammatory response to wounding	2/82	17/18800	0.0024495	0.0258091	0.0199828	GRN/TIMP1	2	1.41421
BP	GO:1901214	regulation of neuron death	6/82	313/18800	0.00246243	0.0258109	0.0199842	PCSK9/APOE/CDC42/UBB/GRN/C1QA	6	1.63299
BP	GO:0032757	positive regulation of interleukin-8 production	3/82	62/18800	0.00251313	0.0262065	0.0202905	APOA2/CD14/LBP	3	0.57735
BP	GO:0016064	immunoglobulin mediated immune response	5/82	216/18800	0.00254648	0.0262833	0.0203499	C4BPB/C1QB/C1QC/C1QA/CRP	5	1.34164
BP	GO:0030258	lipid modification	5/82	216/18800	0.00254648	0.0262833	0.0203499	APOC1/LCAT/APOA1/APOA2/APOE	5	-1.34164
BP	GO:0006022	aminoglycan metabolic process	4/82	131/18800	0.00258863	0.0265417	0.02055	ITIH1/ITIH4/ITIH2/HEXB	4	-1
BP	GO:0010810	regulation of cell-substrate adhesion	5/82	217/18800	0.00259775	0.0265417	0.02055	HRG/APOA1/MMP14/CDC42/FBLN1	5	0.447214
BP	GO:0019724	B cell mediated immunity	5/82	219/18800	0.00270255	0.0272839	0.0211247	C4BPB/C1QB/C1QC/C1QA/CRP	5	1.34164
BP	GO:0044242	cellular lipid catabolic process	5/82	219/18800	0.00270255	0.0272839	0.0211247	APOC3/APOC1/APOA1/APOA2/HEXB	5	-1.34164
BP	GO:0002281	macrophage activation involved in immune response	2/82	18/18800	0.00274791	0.0272839	0.0211247	GRN/LBP	2	1.41421
BP	GO:0030299	intestinal cholesterol absorption	2/82	18/18800	0.00274791	0.0272839	0.0211247	APOA1/APOA2	2	-1.41421
BP	GO:0060263	regulation of respiratory burst	2/82	18/18800	0.00274791	0.0272839	0.0211247	GRN/LBP	2	1.41421
BP	GO:0031638	zymogen activation	3/82	64/18800	0.00275132	0.0272839	0.0211247	KLKB1/APOH/MMP14	3	-0.57735
BP	GO:0009895	negative regulation of catabolic process	6/82	324/18800	0.00292202	0.0288354	0.0223259	APOC3/APOC1/APOA2/TIMP2/TIMP1/QSOX1	6	0
BP	GO:0016042	lipid catabolic process	6/82	327/18800	0.00305784	0.0299298	0.0231733	APOC3/APOC1/APOA1/APOA2/HEXB/APOE	6	-0.816497
BP	GO:0032930	positive regulation of superoxide anion generation	2/82	19/18800	0.00306252	0.0299298	0.0231733	GNAI2/CRP	2	0
BP	GO:0007266	Rho protein signal transduction	4/82	138/18800	0.00312287	0.0303348	0.0234869	APOC3/APOA1/APOE/CDC42	4	0
BP	GO:0051851	modulation by host of symbiont process	3/82	67/18800	0.00313395	0.0303348	0.0234869	ZBED1/APOE/CRP	3	0.57735
BP	GO:0035296	regulation of tube diameter	4/82	141/18800	0.00337326	0.0322622	0.0249792	APOE/GPX1/COMP/CRP	4	2
BP	GO:0097746	blood vessel diameter maintenance	4/82	141/18800	0.00337326	0.0322622	0.0249792	APOE/GPX1/COMP/CRP	4	2
BP	GO:1902176	negative regulation of oxidative stress-induced intrinsic apoptotic signaling pathway	2/82	20/18800	0.0033932	0.0322622	0.0249792	HSPB1/GPX1	2	0
BP	GO:0072593	reactive oxygen species metabolic process	5/82	231/18800	0.00339687	0.0322622	0.0249792	GNAI2/GPX3/GPX1/PON3/CRP	5	1.34164
BP	GO:0035150	regulation of tube size	4/82	142/18800	0.00345968	0.0327053	0.0253222	APOE/GPX1/COMP/CRP	4	2
BP	GO:0019216	regulation of lipid metabolic process	6/82	339/18800	0.0036489	0.0343336	0.0265829	APOC3/APOC1/APOA1/APOA2/APOE/CDC42	6	-0.816497
BP	GO:0050766	positive regulation of phagocytosis	3/82	71/18800	0.0036927	0.0343891	0.0266259	APOA1/APOA2/LMAN2	3	-0.57735
BP	GO:0030449	regulation of complement activation	2/82	21/18800	0.0037398	0.0343891	0.0266259	C4BPB/CD59	2	0
BP	GO:0044241	lipid digestion	2/82	21/18800	0.0037398	0.0343891	0.0266259	APOA1/APOA2	2	-1.41421
BP	GO:0045717	negative regulation of fatty acid biosynthetic process	2/82	21/18800	0.0037398	0.0343891	0.0266259	APOC3/APOC1	2	-1.41421
BP	GO:0098856	intestinal lipid absorption	2/82	21/18800	0.0037398	0.0343891	0.0266259	APOA1/APOA2	2	-1.41421
BP	GO:0062012	regulation of small molecule metabolic process	6/82	342/18800	0.00380911	0.0348468	0.0269803	APOC3/APOC1/APOA1/IGF2/APOE/PGAM1	6	-0.816497
BP	GO:0006801	superoxide metabolic process	3/82	72/18800	0.00384125	0.0348468	0.0269803	GNAI2/PON3/CRP	3	0.57735
BP	GO:1903036	positive regulation of response to wounding	3/82	72/18800	0.00384125	0.0348468	0.0269803	APOH/HRG/GRN	3	-0.57735
BP	GO:0010988	regulation of low-density lipoprotein particle clearance	2/82	22/18800	0.00410218	0.0368831	0.0285569	APOC3/PCSK9	2	-1.41421
BP	GO:0046628	positive regulation of insulin receptor signaling pathway	2/82	22/18800	0.00410218	0.0368831	0.0285569	IGF2/GNAI2	2	-1.41421
BP	GO:0035924	cellular response to vascular endothelial growth factor stimulus	3/82	74/18800	0.00414917	0.0371406	0.0287563	ERN1/HRG/HSPB1	3	-1.73205
BP	GO:0098754	detoxification	4/82	150/18800	0.00420589	0.037367	0.0289316	GPX3/APOE/GPX1/GSTO1	4	2
BP	GO:0016485	protein processing	5/82	243/18800	0.00421141	0.037367	0.0289316	KLKB1/APOH/PCSK9/MMP14/COMP	5	-0.447214
BP	GO:0016052	carbohydrate catabolic process	4/82	152/18800	0.00440814	0.0389418	0.0301508	HEXB/PGAM1/LDHA/ALDOB	4	2
BP	GO:0030194	positive regulation of blood coagulation	2/82	23/18800	0.00448019	0.0390665	0.0302474	APOH/HRG	2	-1.41421
BP	GO:0035988	chondrocyte proliferation	2/82	23/18800	0.00448019	0.0390665	0.0302474	MMP14/COMP	2	1.41421
BP	GO:1900048	positive regulation of hemostasis	2/82	23/18800	0.00448019	0.0390665	0.0302474	APOH/HRG	2	-1.41421
BP	GO:0048143	astrocyte activation	2/82	24/18800	0.00487371	0.0419554	0.0324841	GRN/C1QA	2	1.41421
BP	GO:0050820	positive regulation of coagulation	2/82	24/18800	0.00487371	0.0419554	0.0324841	APOH/HRG	2	-1.41421
BP	GO:2001026	regulation of endothelial cell chemotaxis	2/82	24/18800	0.00487371	0.0419554	0.0324841	HRG/HSPB1	2	-1.41421
BP	GO:0001895	retina homeostasis	3/82	80/18800	0.00516138	0.0442435	0.0342557	HSPB1/ACTB/PIGR	3	0.57735
BP	GO:0031639	plasminogen activation	2/82	25/18800	0.00528259	0.044343	0.0343328	KLKB1/APOH	2	-1.41421
BP	GO:0042178	xenobiotic catabolic process	2/82	25/18800	0.00528259	0.044343	0.0343328	PON3/GSTO1	2	1.41421
BP	GO:1900078	positive regulation of cellular response to insulin stimulus	2/82	25/18800	0.00528259	0.044343	0.0343328	IGF2/GNAI2	2	-1.41421
BP	GO:1903306	negative regulation of regulated secretory pathway	2/82	25/18800	0.00528259	0.044343	0.0343328	GNAI2/RAP1B	2	0
BP	GO:1905048	regulation of metallopeptidase activity	2/82	25/18800	0.00528259	0.044343	0.0343328	TIMP2/TIMP1	2	1.41421
BP	GO:0003015	heart process	5/82	257/18800	0.00532816	0.0444829	0.0344411	THRB/GNAI2/CDC42/GPX1/GSTO1	5	0.447214
BP	GO:0006096	glycolytic process	3/82	81/18800	0.00534322	0.0444829	0.0344411	PGAM1/LDHA/ALDOB	3	1.73205
BP	GO:0045862	positive regulation of proteolysis	6/82	369/18800	0.00549608	0.0455679	0.0352811	KLKB1/APOE/MMP14/GRN/FBLN1/PDCD6	6	1.63299
BP	GO:0006757	ATP generation from ADP	3/82	82/18800	0.00552889	0.0456528	0.0353469	PGAM1/LDHA/ALDOB	3	1.73205
BP	GO:0043410	positive regulation of MAPK cascade	7/82	491/18800	0.00559556	0.0460156	0.0356277	ERN1/IGF2/GNAI2/CCL14/APOE/CDC42/RAP1B	7	0.377964
BP	GO:0007568	aging	4/82	163/18800	0.00563864	0.046182	0.0357566	GPX1/C1QA/COMP/TIMP1	4	2
BP	GO:0010954	positive regulation of protein processing	2/82	26/18800	0.00570668	0.0465509	0.0360422	KLKB1/MMP14	2	0
BP	GO:0044282	small molecule catabolic process	6/82	376/18800	0.00601099	0.0488363	0.0378117	MGAT1/APOE/PON3/BLMH/NQO2/ADA2	6	2.44949
BP	GO:0031330	negative regulation of cellular catabolic process	5/82	265/18800	0.00605299	0.0489808	0.0379236	APOC3/APOC1/TIMP2/TIMP1/QSOX1	5	0.447214
BP	GO:0002719	negative regulation of cytokine production involved in immune response	2/82	27/18800	0.00614587	0.0495342	0.0383521	APOA1/APOA2	2	-1.41421
BP	GO:0031348	negative regulation of defense response	5/82	268/18800	0.0063419	0.0509114	0.0394183	APOA1/APOE/FGL2/GRN/GPX1	5	1.34164
BP	GO:0035023	regulation of Rho protein signal transduction	3/82	87/18800	0.0065152	0.0519525	0.0402244	APOC3/APOA1/APOE	3	-0.57735
BP	GO:0007141	male meiosis I	2/82	28/18800	0.0066	0.0519525	0.0402244	REC8/UBB	2	0
BP	GO:0032801	receptor catabolic process	2/82	28/18800	0.0066	0.0519525	0.0402244	PCSK9/APOE	2	0
BP	GO:0050996	positive regulation of lipid catabolic process	2/82	28/18800	0.0066	0.0519525	0.0402244	APOA1/APOA2	2	-1.41421
BP	GO:1903319	positive regulation of protein maturation	2/82	28/18800	0.0066	0.0519525	0.0402244	KLKB1/MMP14	2	0
BP	GO:1903510	mucopolysaccharide metabolic process	3/82	88/18800	0.00672421	0.0527251	0.0408226	ITIH1/ITIH4/ITIH2	3	-1.73205
BP	GO:0002253	activation of immune response	6/82	386/18800	0.00680666	0.0531655	0.0411636	C4BPB/C1QB/CD59/C1QC/C1QA/CRP	6	1.63299
BP	GO:0006644	phospholipid metabolic process	6/82	388/18800	0.00697456	0.0542675	0.0420168	APOC1/PCSK9/LCAT/APOA1/APOA2/HEXB	6	-1.63299
BP	GO:1902175	regulation of oxidative stress-induced intrinsic apoptotic signaling pathway	2/82	29/18800	0.00706894	0.0547911	0.0424222	HSPB1/GPX1	2	0
BP	GO:0046031	ADP metabolic process	3/82	90/18800	0.0071541	0.0552395	0.0427694	PGAM1/LDHA/ALDOB	3	1.73205
BP	GO:0046890	regulation of lipid biosynthetic process	4/82	175/18800	0.007222	0.0555518	0.0430112	APOC3/APOC1/APOA1/APOE	4	-1
BP	GO:1902905	positive regulation of supramolecular fiber organization	4/82	176/18800	0.00736587	0.0564437	0.0437018	APOA1/APOE/CDC42/GPX1	4	1
BP	GO:0050727	regulation of inflammatory response	6/82	394/18800	0.00749635	0.0570106	0.0441407	KLKB1/APOA1/APOE/GRN/LBP/GPX1	6	0.816497
BP	GO:0034656	nucleobase-containing small molecule catabolic process	2/82	30/18800	0.00755256	0.0570106	0.0441407	MGAT1/ADA2	2	1.41421
BP	GO:0042744	hydrogen peroxide catabolic process	2/82	30/18800	0.00755256	0.0570106	0.0441407	GPX3/GPX1	2	1.41421
BP	GO:0051873	killing by host of symbiont cells	2/82	30/18800	0.00755256	0.0570106	0.0441407	HRG/DCD	2	0
BP	GO:0019217	regulation of fatty acid metabolic process	3/82	92/18800	0.00759997	0.0571552	0.0442526	APOC3/APOC1/APOA1	3	-1.73205
BP	GO:0001936	regulation of endothelial cell proliferation	4/82	178/18800	0.00765925	0.0573876	0.0444326	APOH/IGF2/APOE/PDCD6	4	0
BP	GO:0019433	triglyceride catabolic process	2/82	31/18800	0.00805073	0.0597411	0.0462548	APOC3/APOA1	2	-1.41421
BP	GO:0035767	endothelial cell chemotaxis	2/82	31/18800	0.00805073	0.0597411	0.0462548	HRG/HSPB1	2	-1.41421
BP	GO:1905954	positive regulation of lipid localization	3/82	94/18800	0.00806195	0.0597411	0.0462548	APOC4/APOA1/APOE	3	-0.57735
BP	GO:0050728	negative regulation of inflammatory response	4/82	182/18800	0.00826891	0.0610511	0.0472691	APOA1/APOE/GRN/GPX1	4	1
BP	GO:0010769	regulation of cell morphogenesis involved in differentiation	3/82	96/18800	0.00854016	0.0628246	0.0486422	APOA1/CDC42/FBLN1	3	0.57735
BP	GO:0010596	negative regulation of endothelial cell migration	3/82	97/18800	0.0087854	0.0643944	0.0498577	APOH/HRG/APOE	3	-0.57735
BP	GO:0006165	nucleoside diphosphate phosphorylation	3/82	99/18800	0.00928821	0.0675901	0.0523319	PGAM1/LDHA/ALDOB	3	1.73205
BP	GO:0050764	regulation of phagocytosis	3/82	99/18800	0.00928821	0.0675901	0.0523319	APOA1/APOA2/LMAN2	3	-0.57735
BP	GO:0046939	nucleotide phosphorylation	3/82	100/18800	0.0095458	0.0692156	0.0535905	PGAM1/LDHA/ALDOB	3	1.73205
BP	GO:0034383	low-density lipoprotein particle clearance	2/82	34/18800	0.00963116	0.0695852	0.0538766	APOC3/PCSK9	2	-1.41421
BP	GO:0016032	viral process	6/82	418/18800	0.0098689	0.0710491	0.05501	ZBED1/MGAT1/APOE/CDC42/MRC1/CRP	6	1.63299
BP	GO:0050808	synapse organization	6/82	419/18800	0.00997814	0.0715038	0.0553621	C1QB/APOE/CDC42/C1QC/ACTB/C1QA	6	2.44949
BP	GO:0031647	regulation of protein stability	5/82	300/18800	0.0100516	0.0715038	0.0553621	APOA1/APOA2/AHSP/CPN2/GRN	5	0.447214
BP	GO:0006910	phagocytosis, recognition	3/82	102/18800	0.0100734	0.0715038	0.0553621	C4BPB/LBP/CRP	3	0.57735
BP	GO:0062014	negative regulation of small molecule metabolic process	3/82	102/18800	0.0100734	0.0715038	0.0553621	APOC3/APOC1/APOE	3	-0.57735
BP	GO:0045920	negative regulation of exocytosis	2/82	35/18800	0.0101862	0.0718002	0.0555916	GNAI2/RAP1B	2	0
BP	GO:0045922	negative regulation of fatty acid metabolic process	2/82	35/18800	0.0101862	0.0718002	0.0555916	APOC3/APOC1	2	-1.41421
BP	GO:0009135	purine nucleoside diphosphate metabolic process	3/82	103/18800	0.0103435	0.072155	0.0558663	PGAM1/LDHA/ALDOB	3	1.73205
BP	GO:0009179	purine ribonucleoside diphosphate metabolic process	3/82	103/18800	0.0103435	0.072155	0.0558663	PGAM1/LDHA/ALDOB	3	1.73205
BP	GO:0032760	positive regulation of tumor necrosis factor production	3/82	103/18800	0.0103435	0.072155	0.0558663	HSPB1/CD14/LBP	3	0.57735
BP	GO:0050830	defense response to Gram-positive bacterium	3/82	104/18800	0.0106178	0.0735053	0.0569117	DEFB1/LBP/CRP	3	1.73205
BP	GO:0043393	regulation of protein binding	4/82	196/18800	0.0106513	0.0735053	0.0569117	PCSK9/APOE/CDC42/ACTB	4	1
BP	GO:0007162	negative regulation of cell adhesion	5/82	305/18800	0.0107421	0.0735053	0.0569117	HRG/APOA1/MMP14/FGL2/FBLN1	5	0.447214
BP	GO:0032409	regulation of transporter activity	5/82	305/18800	0.0107421	0.0735053	0.0569117	PCSK9/RXRA/APOA2/ACTB/GSTO1	5	-0.447214
BP	GO:0042789	mRNA transcription by RNA polymerase II	2/82	36/18800	0.0107551	0.0735053	0.0569117	THRB/RXRA	2	-1.41421
BP	GO:0060428	lung epithelium development	2/82	36/18800	0.0107551	0.0735053	0.0569117	THRB/CDC42	2	0
BP	GO:0032410	negative regulation of transporter activity	3/82	106/18800	0.0111789	0.0758889	0.0587573	PCSK9/APOA2/GSTO1	3	-0.57735
BP	GO:0042116	macrophage activation	3/82	106/18800	0.0111789	0.0758889	0.0587573	GRN/LBP/C1QA	3	1.73205
BP	GO:0007229	integrin-mediated signaling pathway	3/82	107/18800	0.0114658	0.0773175	0.0598634	APOA1/CDC42/TIMP1	3	0.57735
BP	GO:1903557	positive regulation of tumor necrosis factor superfamily cytokine production	3/82	107/18800	0.0114658	0.0773175	0.0598634	HSPB1/CD14/LBP	3	0.57735
BP	GO:0006979	response to oxidative stress	6/82	433/18800	0.0115997	0.0777903	0.0602295	ERN1/HSPB1/GPX3/APOE/MMP14/GPX1	6	0.816497
BP	GO:0070372	regulation of ERK1 and ERK2 cascade	5/82	311/18800	0.0116128	0.0777903	0.0602295	GNAI2/CCL14/APOE/FBLN1/RAP1B	5	1.34164
BP	GO:0002385	mucosal immune response	2/82	38/18800	0.0119341	0.0791561	0.061287	DEFB1/PIGR	2	1.41421
BP	GO:0002701	negative regulation of production of molecular mediator of immune response	2/82	38/18800	0.0119341	0.0791561	0.061287	APOA1/APOA2	2	-1.41421
BP	GO:0007617	mating behavior	2/82	38/18800	0.0119341	0.0791561	0.061287	THRB/HEXB	2	0
BP	GO:0009408	response to heat	3/82	109/18800	0.0120522	0.0792498	0.0613595	HSPB1/CD14/PDCD6	3	0.57735
BP	GO:0034446	substrate adhesion-dependent cell spreading	3/82	109/18800	0.0120522	0.0792498	0.0613595	APOA1/CDC42/FBLN1	3	0.57735
BP	GO:0051604	protein maturation	5/82	314/18800	0.0120657	0.0792498	0.0613595	KLKB1/APOH/PCSK9/MMP14/COMP	5	-0.447214
BP	GO:0048259	regulation of receptor-mediated endocytosis	3/82	110/18800	0.0123518	0.0808665	0.0626112	APOC3/APOC1/PCSK9	3	-1.73205
BP	GO:0043523	regulation of neuron apoptotic process	4/82	207/18800	0.0128063	0.0835716	0.0647057	PCSK9/APOE/CDC42/GRN	4	1
BP	GO:0009185	ribonucleoside diphosphate metabolic process	3/82	112/18800	0.0129638	0.0840569	0.0650814	PGAM1/LDHA/ALDOB	3	1.73205
BP	GO:0010633	negative regulation of epithelial cell migration	3/82	112/18800	0.0129638	0.0840569	0.0650814	APOH/HRG/APOE	3	-0.57735
BP	GO:0017158	regulation of calcium ion-dependent exocytosis	2/82	40/18800	0.0131671	0.0851021	0.0658907	GNAI2/RAP1B	2	0
BP	GO:0042180	cellular ketone metabolic process	4/82	211/18800	0.0136542	0.0875376	0.0677763	APOC3/APOC1/APOA1/NQO2	4	-1
BP	GO:0050679	positive regulation of epithelial cell proliferation	4/82	211/18800	0.0136542	0.0875376	0.0677763	IGF2/CDC42/GRN/PDCD6	4	1
BP	GO:0002251	organ or tissue specific immune response	2/82	41/18800	0.0138035	0.0875376	0.0677763	DEFB1/PIGR	2	1.41421
BP	GO:0009299	mRNA transcription	2/82	41/18800	0.0138035	0.0875376	0.0677763	THRB/RXRA	2	-1.41421
BP	GO:0010591	regulation of lamellipodium assembly	2/82	41/18800	0.0138035	0.0875376	0.0677763	HRG/CDC42	2	0
BP	GO:0050892	intestinal absorption	2/82	41/18800	0.0138035	0.0875376	0.0677763	APOA1/APOA2	2	-1.41421
BP	GO:0006457	protein folding	4/82	212/18800	0.0138716	0.0876945	0.0678978	HSPB1/AHSP/GRN/QSOX1	4	1
BP	GO:0044706	multi-multicellular organism process	4/82	213/18800	0.0140912	0.0888053	0.0687578	AMBP/HEXB/FBLN1/TIMP1	4	1
BP	GO:0030574	collagen catabolic process	2/82	42/18800	0.0144531	0.0902425	0.0698706	MMP14/PEPD	2	1.41421
BP	GO:0034142	toll-like receptor 4 signaling pathway	2/82	42/18800	0.0144531	0.0902425	0.0698706	CD14/LBP	2	1.41421
BP	GO:1900026	positive regulation of substrate adhesion-dependent cell spreading	2/82	42/18800	0.0144531	0.0902425	0.0698706	APOA1/CDC42	2	0
BP	GO:0071346	cellular response to interferon-gamma	3/82	118/18800	0.0149026	0.092763	0.0718221	CCL14/CDC42/MRC1	3	1.73205
BP	GO:0014002	astrocyte development	2/82	43/18800	0.0151156	0.0935136	0.0724033	GRN/C1QA	2	1.41421
BP	GO:0044058	regulation of digestive system process	2/82	43/18800	0.0151156	0.0935136	0.0724033	APOA1/APOA2	2	-1.41421
BP	GO:0070371	ERK1 and ERK2 cascade	5/82	335/18800	0.015577	0.0960741	0.0743858	GNAI2/CCL14/APOE/FBLN1/RAP1B	5	1.34164
BP	GO:0070374	positive regulation of ERK1 and ERK2 cascade	4/82	220/18800	0.0156905	0.09648	0.0747	GNAI2/CCL14/APOE/RAP1B	4	1
BP	GO:0019098	reproductive behavior	2/82	44/18800	0.0157911	0.0965118	0.0747246	THRB/HEXB	2	0
BP	GO:0021762	substantia nigra development	2/82	44/18800	0.0157911	0.0965118	0.0747246	CDC42/ACTB	2	1.41421
BP	GO:0010811	positive regulation of cell-substrate adhesion	3/82	122/18800	0.0162814	0.099209	0.0768129	HRG/APOA1/CDC42	3	-0.57735
BP	GO:0002920	regulation of humoral immune response	2/82	45/18800	0.0164793	0.0998133	0.0772809	C4BPB/CD59	2	0
BP	GO:0008631	intrinsic apoptotic signaling pathway in response to oxidative stress	2/82	45/18800	0.0164793	0.0998133	0.0772809	HSPB1/GPX1	2	0
CC	GO:0034364	high-density lipoprotein particle	10/83	27/19594	8.44577e-18	1.6976e-15	1.30687e-15	APOF/APOC3/APOC1/APOH/APOC4/LCAT/APOA1/APOA2/SAA4/APOE	10	-2.52982
CC	GO:0034358	plasma lipoprotein particle	10/83	36/19594	2.46813e-16	1.65365e-14	1.27304e-14	APOF/APOC3/APOC1/APOH/APOC4/LCAT/APOA1/APOA2/SAA4/APOE	10	-2.52982
CC	GO:1990777	lipoprotein particle	10/83	36/19594	2.46813e-16	1.65365e-14	1.27304e-14	APOF/APOC3/APOC1/APOH/APOC4/LCAT/APOA1/APOA2/SAA4/APOE	10	-2.52982
CC	GO:0032994	protein-lipid complex	10/83	39/19594	6.11046e-16	3.0705e-14	2.36378e-14	APOF/APOC3/APOC1/APOH/APOC4/LCAT/APOA1/APOA2/SAA4/APOE	10	-2.52982
CC	GO:0062023	collagen-containing extracellular matrix	19/83	429/19594	1.39163e-14	5.59437e-13	4.30674e-13	AMBP/APOC3/PRG4/APOH/ITIH1/HRG/APOA1/ITIH4/ITIH2/C1QB/LTBP2/TIMP2/APOE/FGL2/FBLN1/C1QC/C1QA/COMP/TIMP1	19	0.229416
CC	GO:0072562	blood microparticle	12/83	147/19594	1.23795e-12	3.52049e-11	2.7102e-11	AMBP/ITIH1/HRG/APOA1/ITIH4/APOA2/ITIH2/C1QB/CPN2/APOE/C1QC/ACTB	12	-0.57735
CC	GO:0034361	very-low-density lipoprotein particle	7/83	20/19594	1.40119e-12	3.52049e-11	2.7102e-11	APOC3/APOC1/APOH/APOC4/APOA1/APOA2/APOE	7	-1.88982
CC	GO:0034385	triglyceride-rich plasma lipoprotein particle	7/83	20/19594	1.40119e-12	3.52049e-11	2.7102e-11	APOC3/APOC1/APOH/APOC4/APOA1/APOA2/APOE	7	-1.88982
CC	GO:0042627	chylomicron	6/83	13/19594	8.05453e-12	1.79884e-10	1.38481e-10	APOC3/APOC1/APOH/APOA1/APOA2/APOE	6	-1.63299
CC	GO:0034774	secretory granule lumen	12/83	322/19594	1.07912e-08	2.14508e-07	1.65135e-07	APOH/HRG/APOA1/IGF2/ITIH4/HEXB/TIMP2/GRN/PGAM1/TIMP1/ADA2/QSOX1	12	0.57735
CC	GO:0060205	cytoplasmic vesicle lumen	12/83	325/19594	1.19629e-08	2.14508e-07	1.65135e-07	APOH/HRG/APOA1/IGF2/ITIH4/HEXB/TIMP2/GRN/PGAM1/TIMP1/ADA2/QSOX1	12	0.57735
CC	GO:0031983	vesicle lumen	12/83	327/19594	1.28064e-08	2.14508e-07	1.65135e-07	APOH/HRG/APOA1/IGF2/ITIH4/HEXB/TIMP2/GRN/PGAM1/TIMP1/ADA2/QSOX1	12	0.57735
CC	GO:0005788	endoplasmic reticulum lumen	8/83	311/19594	5.17125e-05	0.000799555	0.000615526	PCSK9/APOA1/PROZ/APOA2/ITIH2/APOE/TIMP1/QSOX1	8	-0.707107
CC	GO:0031362	anchored component of external side of plasma membrane	3/83	20/19594	7.93164e-05	0.00113876	0.000876655	CD59/CD14/GP1BA	3	1.73205
CC	GO:0031233	intrinsic component of external side of plasma membrane	3/83	24/19594	0.000139109	0.00186407	0.00143502	CD59/CD14/GP1BA	3	1.73205
CC	GO:0031093	platelet alpha granule lumen	4/83	67/19594	0.000187265	0.00235252	0.00181105	HRG/IGF2/TIMP1/QSOX1	4	0
CC	GO:0005766	primary lysosome	5/83	155/19594	0.000513169	0.00573039	0.00441145	HEXB/GRN/RAP1B/PIGR/ADA2	5	2.23607
CC	GO:0042582	azurophil granule	5/83	155/19594	0.000513169	0.00573039	0.00441145	HEXB/GRN/RAP1B/PIGR/ADA2	5	2.23607
CC	GO:0031091	platelet alpha granule	4/83	91/19594	0.000604595	0.00639598	0.00492385	HRG/IGF2/TIMP1/QSOX1	4	0
CC	GO:0030134	COPII-coated ER to Golgi transport vesicle	4/83	94/19594	0.000683241	0.00686657	0.00528613	PCSK9/CD59/LMAN2/PDCD6	4	1
CC	GO:0017119	Golgi transport complex	2/83	11/19594	0.000951165	0.00910401	0.00700858	COG2/CDC42	2	0
CC	GO:0034362	low-density lipoprotein particle	2/83	12/19594	0.00113826	0.0103996	0.00800595	APOF/APOE	2	0
CC	GO:0031089	platelet dense granule lumen	2/83	14/19594	0.00156081	0.0136401	0.0105006	APOH/ITIH4	2	-1.41421
CC	GO:0046658	anchored component of plasma membrane	3/83	62/19594	0.00231517	0.0193895	0.0149267	CD59/CD14/GP1BA	3	1.73205
CC	GO:0042827	platelet dense granule	2/83	21/19594	0.00353326	0.0284074	0.021869	APOH/ITIH4	2	-1.41421
CC	GO:0071682	endocytic vesicle lumen	2/83	23/19594	0.00423345	0.031853	0.0245215	APOA1/APOE	2	0
CC	GO:0033116	endoplasmic reticulum-Golgi intermediate compartment membrane	3/83	77/19594	0.00427876	0.031853	0.0245215	CD59/MGAT1/LMAN2	3	1.73205
CC	GO:0031225	anchored component of membrane	4/83	169/19594	0.00578423	0.0403755	0.0310825	CD59/CD14/GP1BA/ITLN1	4	2
CC	GO:0005581	collagen trimer	3/83	86/19594	0.00582532	0.0403755	0.0310825	C1QB/C1QC/C1QA	3	1.73205
CC	GO:0036019	endolysosome	2/83	28/19594	0.006239	0.0418013	0.0321801	PCSK9/HRG	2	-1.41421
CC	GO:0035578	azurophil granule lumen	3/83	91/19594	0.00681136	0.044164	0.033999	HEXB/GRN/ADA2	3	1.73205
CC	GO:0030135	coated vesicle	5/83	290/19594	0.0077902	0.0489322	0.0376697	PCSK9/CD59/APOE/LMAN2/PDCD6	5	1.34164
CC	GO:0005796	Golgi lumen	3/83	104/19594	0.00981734	0.0597965	0.0460335	PROZ/DEFB1/MMP14	3	0.57735
CC	GO:1904813	ficolin-1-rich granule lumen	3/83	124/19594	0.0157427	0.0930673	0.0716465	TIMP2/FGL2/PGAM1	3	1.73205
MF	GO:0070325	lipoprotein particle receptor binding	6/83	29/18410	3.05532e-09	7.6383e-07	5.21013e-07	APOC3/PCSK9/APOA1/APOA2/APOE/CRP	6	-0.816497
MF	GO:0004857	enzyme inhibitor activity	12/83	390/18410	1.72446e-07	1.59677e-05	1.08916e-05	AMBP/APOC3/APOC1/ITIH1/HRG/HSPB1/FETUB/ITIH4/APOA2/ITIH2/TIMP2/TIMP1	12	-2.3094
MF	GO:0071813	lipoprotein particle binding	5/83	31/18410	2.55483e-07	1.59677e-05	1.08916e-05	PCSK9/APOA1/APOA2/APOE/CRP	5	-0.447214
MF	GO:0071814	protein-lipid complex binding	5/83	31/18410	2.55483e-07	1.59677e-05	1.08916e-05	PCSK9/APOA1/APOA2/APOE/CRP	5	-0.447214
MF	GO:0061134	peptidase regulator activity	9/83	230/18410	9.34222e-07	4.49272e-05	3.06451e-05	AMBP/ITIH1/HRG/FETUB/ITIH4/ITIH2/TIMP2/FBLN1/TIMP1	9	-1
MF	GO:0005539	glycosaminoglycan binding	9/83	234/18410	1.07825e-06	4.49272e-05	3.06451e-05	APOH/ITIH1/HABP2/HRG/ITIH2/LTBP2/APOE/COMP/ADA2	9	-0.333333
MF	GO:0004866	endopeptidase inhibitor activity	8/83	180/18410	1.50912e-06	5.38972e-05	3.67636e-05	AMBP/ITIH1/HRG/FETUB/ITIH4/ITIH2/TIMP2/TIMP1	8	-1.41421
MF	GO:0030414	peptidase inhibitor activity	8/83	187/18410	2.00837e-06	6.27615e-05	4.28099e-05	AMBP/ITIH1/HRG/FETUB/ITIH4/ITIH2/TIMP2/TIMP1	8	-1.41421
MF	GO:0061135	endopeptidase regulator activity	8/83	194/18410	2.6418e-06	7.33834e-05	5.00552e-05	AMBP/ITIH1/HRG/FETUB/ITIH4/ITIH2/TIMP2/TIMP1	8	-1.41421
MF	GO:0043394	proteoglycan binding	4/83	36/18410	2.02683e-05	0.000506709	0.000345629	HRG/APOE/COMP/ADA2	4	1
MF	GO:0008191	metalloendopeptidase inhibitor activity	3/83	16/18410	4.74308e-05	0.00107797	0.000735291	FETUB/TIMP2/TIMP1	3	0.57735
MF	GO:0055102	lipase inhibitor activity	3/83	17/18410	5.74072e-05	0.00119598	0.000815787	APOC3/APOC1/APOA2	3	-1.73205
MF	GO:0043395	heparan sulfate proteoglycan binding	3/83	18/18410	6.86647e-05	0.00132047	0.000900703	HRG/APOE/COMP	3	0.57735
MF	GO:0015485	cholesterol binding	4/83	50/18410	7.55316e-05	0.0013438	0.000916613	APOF/APOC3/APOA1/APOA2	4	-2
MF	GO:0004867	serine-type endopeptidase inhibitor activity	5/83	98/18410	8.0628e-05	0.0013438	0.000916613	AMBP/ITIH1/HRG/ITIH4/ITIH2	5	-2.23607
MF	GO:0005496	steroid binding	5/83	100/18410	8.87592e-05	0.00138686	0.000945986	APOF/APOC3/APOA1/APOA2/SHBG	5	-1.34164
MF	GO:0008201	heparin binding	6/83	168/18410	0.000111534	0.00164021	0.00111879	APOH/HRG/LTBP2/APOE/COMP/ADA2	6	0.816497
MF	GO:0120020	cholesterol transfer activity	3/83	22/18410	0.000127911	0.00177654	0.00121179	APOA1/APOA2/APOE	3	-0.57735
MF	GO:0120015	sterol transfer activity	3/83	23/18410	0.00014662	0.00192921	0.00131593	APOA1/APOA2/APOE	3	-0.57735
MF	GO:0032934	sterol binding	4/83	60/18410	0.00015455	0.00193187	0.00131774	APOF/APOC3/APOA1/APOA2	4	-2
MF	GO:0050750	low-density lipoprotein particle receptor binding	3/83	24/18410	0.000167021	0.00198835	0.00135626	PCSK9/APOE/CRP	3	0.57735
MF	GO:0031210	phosphatidylcholine binding	3/83	31/18410	0.000362584	0.00412027	0.00281046	APOC1/APOA1/APOA2	3	-1.73205
MF	GO:0015248	sterol transporter activity	3/83	36/18410	0.000566663	0.0061376	0.00418649	APOA1/APOA2/APOE	3	-0.57735
MF	GO:0016209	antioxidant activity	4/83	85/18410	0.000589209	0.0061376	0.00418649	GPX3/APOE/GPX1/GSTO1	4	2
MF	GO:0043178	alcohol binding	4/83	89/18410	0.000700884	0.00665079	0.00453654	APOF/APOC3/APOA1/APOA2	4	-2
MF	GO:0004177	aminopeptidase activity	3/83	39/18410	0.000718285	0.00665079	0.00453654	MMP14/PEPD/BLMH	3	1.73205
MF	GO:0050997	quaternary ammonium group binding	3/83	39/18410	0.000718285	0.00665079	0.00453654	APOC1/APOA1/APOA2	3	-1.73205
MF	GO:0005319	lipid transporter activity	5/83	159/18410	0.000761641	0.00680036	0.00463856	APOF/APOC4/APOA1/APOA2/APOE	5	-1.34164
MF	GO:0008083	growth factor activity	5/83	162/18410	0.000828495	0.0071422	0.00487173	INHBC/IGF2/GRN/TIMP1/ADA2	5	0.447214
MF	GO:0071723	lipopeptide binding	2/83	10/18410	0.000882724	0.00735604	0.00501759	CD14/LBP	2	1.41421
MF	GO:0005201	extracellular matrix structural constituent	5/83	172/18410	0.00108326	0.00873601	0.00595888	PRG4/LTBP2/FGL2/FBLN1/COMP	5	1.34164
MF	GO:0004252	serine-type endopeptidase activity	5/83	174/18410	0.0011405	0.00891012	0.00607764	KLKB1/PCSK9/HABP2/PROZ/MMP14	5	-1.34164
MF	GO:0008035	high-density lipoprotein particle binding	2/83	12/18410	0.0012871	0.00960264	0.00655001	APOA1/APOA2	2	-1.41421
MF	GO:1901681	sulfur compound binding	6/83	267/18410	0.00130596	0.00960264	0.00655001	APOH/HRG/LTBP2/APOE/COMP/ADA2	6	0.816497
MF	GO:0120013	lipid transfer activity	3/83	49/18410	0.00140186	0.0100133	0.00683013	APOA1/APOA2/APOE	3	-0.57735
MF	GO:0008236	serine-type peptidase activity	5/83	191/18410	0.00172165	0.0119559	0.00815519	KLKB1/PCSK9/HABP2/PROZ/MMP14	5	-1.34164
MF	GO:0017171	serine hydrolase activity	5/83	195/18410	0.00188518	0.0127377	0.00868846	KLKB1/PCSK9/HABP2/PROZ/MMP14	5	-1.34164
MF	GO:0033218	amide binding	7/83	402/18410	0.00224429	0.014765	0.0100713	APOA1/RXRA/APOE/CD14/LBP/C1QA/NQO2	7	1.13389
MF	GO:0031072	heat shock protein binding	4/83	123/18410	0.00232136	0.0148805	0.0101501	ERN1/APOA1/APOA2/LMAN2	4	-1
MF	GO:0030169	low-density lipoprotein particle binding	2/83	18/18410	0.00293181	0.0178769	0.0121939	PCSK9/CRP	2	0
MF	GO:0034185	apolipoprotein binding	2/83	18/18410	0.00293181	0.0178769	0.0121939	PCSK9/LCAT	2	-1.41421
MF	GO:0042277	peptide binding	6/83	322/18410	0.00333683	0.0198621	0.013548	APOA1/RXRA/APOE/CD14/LBP/C1QA	6	0.816497
MF	GO:0001848	complement binding	2/83	20/18410	0.0036196	0.0210442	0.0143543	CD59/CRP	2	1.41421
MF	GO:0048029	monosaccharide binding	3/83	71/18410	0.00405041	0.0230137	0.0156978	MRC1/LMAN2/ALDOB	3	1.73205
MF	GO:0004602	glutathione peroxidase activity	2/83	22/18410	0.00437504	0.0237774	0.0162187	GPX3/GPX1	2	1.41421
MF	GO:0005537	mannose binding	2/83	22/18410	0.00437504	0.0237774	0.0162187	MRC1/LMAN2	2	1.41421
MF	GO:0005540	hyaluronic acid binding	2/83	24/18410	0.00519691	0.0270672	0.0184627	ITIH1/ITIH2	2	-1.41421
MF	GO:0019865	immunoglobulin binding	2/83	24/18410	0.00519691	0.0270672	0.0184627	AMBP/HRG	2	-1.41421
MF	GO:0005178	integrin binding	4/83	156/18410	0.00542753	0.0276915	0.0188885	IGF2/MMP14/FBLN1/COMP	4	1
MF	GO:0001540	amyloid-beta binding	3/83	81/18410	0.00585469	0.0292734	0.0199676	APOA1/APOE/C1QA	3	0.57735
MF	GO:0048018	receptor ligand activity	7/83	489/18410	0.00653445	0.0314979	0.0214849	INHBC/APOA1/IGF2/CCL14/GRN/TIMP1/ADA2	7	0.377964
MF	GO:0070006	metalloaminopeptidase activity	2/83	27/18410	0.00655155	0.0314979	0.0214849	MMP14/PEPD	2	1.41421
MF	GO:0030546	signaling receptor activator activity	7/83	496/18410	0.00704366	0.0332248	0.0226628	INHBC/APOA1/IGF2/CCL14/GRN/TIMP1/ADA2	7	0.377964
MF	GO:0030246	carbohydrate binding	5/83	270/18410	0.00749478	0.0346981	0.0236677	PRG4/MRC1/LMAN2/ITLN1/ALDOB	5	1.34164
MF	GO:0008200	ion channel inhibitor activity	2/83	32/18410	0.00912424	0.0414738	0.0282895	AMBP/PCSK9	2	-1.41421
MF	GO:0016248	channel inhibitor activity	2/83	33/18410	0.00968469	0.0432352	0.029491	AMBP/PCSK9	2	-1.41421
MF	GO:0001530	lipopolysaccharide binding	2/83	34/18410	0.0102601	0.0450005	0.0306951	CD14/LBP	2	1.41421
MF	GO:0008238	exopeptidase activity	3/83	102/18410	0.0110136	0.0474722	0.0323811	MMP14/PEPD/BLMH	3	1.73205
MF	GO:0071949	FAD binding	2/83	37/18410	0.0120747	0.0511641	0.0348993	NQO2/QSOX1	2	1.41421
MF	GO:0004175	endopeptidase activity	6/83	432/18410	0.0133438	0.0555994	0.0379246	KLKB1/PCSK9/HABP2/PROZ/MMP14/BLMH	6	-0.816497
MF	GO:0003925	G protein activity	2/83	40/18410	0.014019	0.0574548	0.0391902	CDC42/RAP1B	2	1.41421
MF	GO:0015036	disulfide oxidoreductase activity	2/83	42/18410	0.0153853	0.0620374	0.0423161	GSTO1/QSOX1	2	1.41421
MF	GO:0048156	tau protein binding	2/83	43/18410	0.0160891	0.0638456	0.0435494	APOE/ACTB	2	1.41421
MF	GO:0004180	carboxypeptidase activity	2/83	44/18410	0.0168065	0.0656502	0.0447804	PEPD/BLMH	2	1.41421
MF	GO:0008375	acetylglucosaminyltransferase activity	2/83	45/18410	0.0175373	0.0674511	0.0460087	HEXB/MGAT1	2	1.41421
MF	GO:0005543	phospholipid binding	6/83	467/18410	0.0188743	0.07104	0.0484568	APOC3/APOC1/APOH/APOA1/APOA2/APOE	6	-1.63299
MF	GO:0048020	CCR chemokine receptor binding	2/83	47/18410	0.0190387	0.07104	0.0484568	CCL14/DEFB1	2	1.41421
MF	GO:0005125	cytokine activity	4/83	235/18410	0.021706	0.0798014	0.054433	INHBC/CCL14/GRN/TIMP1	4	1
MF	GO:0004601	peroxidase activity	2/83	52/18410	0.0230185	0.081051	0.0552853	GPX3/GPX1	2	1.41421
MF	GO:0004879	nuclear receptor activity	2/83	52/18410	0.0230185	0.081051	0.0552853	THRB/RXRA	2	-1.41421
MF	GO:0098531	ligand-activated transcription factor activity	2/83	52/18410	0.0230185	0.081051	0.0552853	THRB/RXRA	2	-1.41421
MF	GO:0002020	protease binding	3/83	136/18410	0.0235946	0.0819257	0.055882	TIMP2/COMP/TIMP1	3	1.73205
MF	GO:0004869	cysteine-type endopeptidase inhibitor activity	2/83	56/18410	0.0264264	0.0892784	0.0608973	HRG/FETUB	2	-1.41421
MF	GO:0016684	oxidoreductase activity, acting on peroxide as acceptor	2/83	56/18410	0.0264264	0.0892784	0.0608973	GPX3/GPX1	2	1.41421
MF	GO:0016667	oxidoreductase activity, acting on a sulfur group of donors	2/83	57/18410	0.0273085	0.0910283	0.0620909	GSTO1/QSOX1	2	1.41421
MF	GO:0140678	molecular function inhibitor activity	2/83	59/18410	0.0291079	0.0957496	0.0653113	AMBP/PCSK9	2	-1.41421
MF	GO:0052689	carboxylic ester hydrolase activity	3/83	149/18410	0.0298299	0.0968503	0.0660621	LCAT/APMAP/PON3	3	-0.57735
KEGG	hsa04979	Cholesterol metabolism	8/50	51/8164	5.75266e-10	9.49189e-08	8.23539e-08	APOC3/APOC1/APOH/PCSK9/LCAT/APOA1/APOA2/APOE	8	-2.12132
KEGG	hsa05133	Pertussis	6/50	76/8164	6.11841e-06	0.000504769	0.000437949	C4BPB/GNAI2/C1QB/CD14/C1QC/C1QA	6	0.816497
KEGG	hsa04610	Complement and coagulation cascades	6/50	85/8164	1.17399e-05	0.000645693	0.000560219	KLKB1/C4BPB/C1QB/CD59/C1QC/C1QA	6	0.816497
KEGG	hsa05417	Lipid and atherosclerosis	7/50	215/8164	0.000303805	0.012532	0.010873	ERN1/APOA1/RXRA/CD14/CDC42/LBP/RAP1B	7	0.377964
KEGG	hsa00010	Glycolysis / Gluconeogenesis	4/50	67/8164	0.000718452	0.0237089	0.0205704	PGAM1/LDHB/LDHA/ALDOB	4	2
KEGG	hsa03320	PPAR signaling pathway	4/50	75/8164	0.00109908	0.0302247	0.0262237	APOC3/APOA1/RXRA/APOA2	4	-2
KEGG	hsa04936	Alcoholic liver disease	5/50	142/8164	0.00167567	0.039498	0.0342694	C1QB/CD14/LBP/C1QC/C1QA	5	2.23607
KEGG	hsa05150	Staphylococcus aureus infection	4/50	96/8164	0.00273395	0.0563877	0.0489233	C1QB/DEFB1/C1QC/C1QA	4	2
KEGG	hsa05142	Chagas disease	4/50	102/8164	0.00340466	0.0624188	0.054156	GNAI2/C1QB/C1QC/C1QA	4	1
KEGG	hsa04066	HIF-1 signaling pathway	4/50	109/8164	0.00431972	0.0696681	0.0604457	TIMP1/LDHB/LDHA/ALDOB	4	2
KEGG	hsa00480	Glutathione metabolism	3/50	57/8164	0.00501362	0.0696681	0.0604457	GPX3/GPX1/GSTO1	3	1.73205
KEGG	hsa04670	Leukocyte transendothelial migration	4/50	114/8164	0.00506677	0.0696681	0.0604457	GNAI2/CDC42/RAP1B/ACTB	4	1
KEGG	hsa04611	Platelet activation	4/50	124/8164	0.00681207	0.0864609	0.0750156	GNAI2/GP1BA/RAP1B/ACTB	4	1
KEGG	hsa04510	Focal adhesion	5/50	201/8164	0.00742446	0.0875026	0.0759193	CHAD/CDC42/RAP1B/ACTB/COMP	5	1.34164
KEGG	hsa05230	Central carbon metabolism in cancer	3/50	70/8164	0.00887241	0.0960092	0.0832999	PGAM1/LDHB/LDHA	3	1.73205
KEGG	hsa04977	Vitamin digestion and absorption	2/50	24/8164	0.00930999	0.0960092	0.0832999	APOA1/BTD	2	0
